# Supplementary material
Source: Springer Nature journal article supplement (https://www.springermedizin.de/resource/supplementary/12894_2013_307_MOESM4_ESM.pdf/9513662)

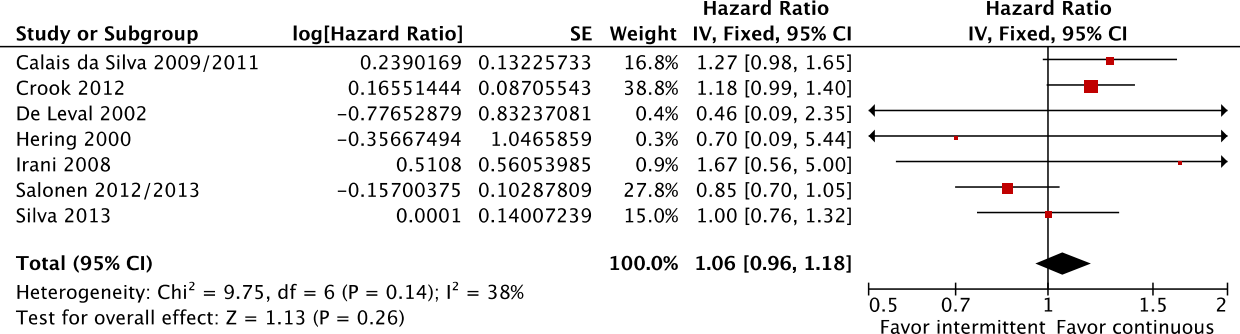

Supplement: MOESM4 [file 9513662]
